# Supplementary material
Source: PubMed Central journal article supplement (PMC3988695)
Supplement: NIHMS567966-supplement-Supp1.pdf [file NIHMS567966-supplement-Supp1.pdf]

Experiment 1a Acute Nicotine (0 or 0.09 mg/kg, IP during acquisition)

| Efficiency Ratio |      |          |      |      | Rewards |       |          |       |      |
|------------------|------|----------|------|------|---------|-------|----------|-------|------|
| Saline           |      | Nicotine |      |      | Saline  |       | Nicotine |       |      |
| Day              | Mean | SEM      | Mean | SEM  | Day     | Mean  | SEM      | Mean  | SEM  |
| 1                | 0.11 | 0.03     | 0.08 | 0.04 | 1       | 14.57 | 3.43     | 9.63  | 3.19 |
| 2                | 0.12 | 0.04     | 0.11 | 0.07 | 2       | 16.14 | 4.21     | 6.75  | 2.48 |
| 3                | 0.24 | 0.07     | 0.13 | 0.08 | 3       | 20.14 | 4.29     | 9.38  | 4.04 |
| 4                | 0.28 | 0.08     | 0.17 | 0.07 | 4       | 17.43 | 4.10     | 10.38 | 3.83 |
| 5                | 0.26 | 0.08     | 0.21 | 0.11 | 5       | 20.71 | 4.20     | 12.25 | 4.07 |
| 6                | 0.31 | 0.11     | 0.27 | 0.11 | 6       | 21.57 | 4.87     | 13.63 | 4.09 |
| 7                | 0.31 | 0.08     | 0.23 | 0.08 | 7       | 21.43 | 5.95     | 19.88 | 4.13 |
| 8                | 0.42 | 0.13     | 0.33 | 0.09 | 8       | 22.14 | 5.71     | 19.13 | 4.65 |
| 9                | 0.45 | 0.13     | 0.37 | 0.11 | 9       | 25.71 | 4.91     | 17.13 | 3.41 |
| 10               | 0.42 | 0.12     | 0.36 | 0.09 | 10      | 25.00 | 3.59     | 22.50 | 3.48 |

ANOVAs

| Day         | F(9,13)=8.102, p<0.05 | Day         | F(9,13)=6.95, p<0.05  |
|-------------|-----------------------|-------------|-----------------------|
| Drug        | F(1,13)=0.41, p>0.05  | Drug        | F(1,13)=1.62, p>0.05  |
| Interaction | F(9,117)=0.21, p>0.05 | Interaction | F(9,117)=0.99, p>0.05 |

Premature "Active" Responses

| Premature "Active" Responses |        |          |        |       | Total ITI Responses |       |          |       |       |
|------------------------------|--------|----------|--------|-------|---------------------|-------|----------|-------|-------|
| Saline                       |        | Nicotine |        |       | Saline              |       | Nicotine |       |       |
| Day                          | Mean   | SEM      | Mean   | SEM   | Day                 | Mean  | SEM      | Mean  | SEM   |
| 1                            | 184.57 | 63.95    | 134.38 | 35.55 | 1                   | 85.14 | 22.73    | 82.25 | 19.29 |
| 2                            | 129.29 | 29.30    | 82.25  | 14.37 | 2                   | 86.00 | 15.18    | 63.13 | 10.24 |
| 3                            | 102.29 | 32.30    | 97.25  | 28.19 | 3                   | 66.43 | 18.82    | 73.63 | 21.53 |
| 4                            | 79.71  | 30.94    | 101.38 | 39.38 | 4                   | 49.14 | 18.83    | 54.75 | 15.23 |
| 5                            | 78.86  | 18.55    | 106.38 | 30.76 | 5                   | 50.86 | 9.88     | 57.88 | 15.06 |
| 6                            | 104.71 | 42.61    | 106.25 | 42.48 | 6                   | 54.43 | 15.55    | 57.38 | 18.14 |
| 7                            | 48.43  | 21.78    | 97.50  | 21.54 | 7                   | 35.00 | 13.28    | 65.38 | 11.80 |
| 8                            | 73.14  | 39.50    | 58.50  | 22.57 | 8                   | 36.57 | 18.04    | 45.75 | 17.48 |
| 9                            | 79.00  | 40.02    | 59.75  | 22.10 | 9                   | 45.29 | 20.92    | 42.63 | 15.54 |
| 10                           | 51.57  | 15.24    | 72.63  | 28.33 | 10                  | 34.14 | 9.54     | 40.13 | 12.46 |

ANOVAs

| Day         | F(9,13)=2.84, p<0.05  | Day         | F(9,13)=3.47, p<0.05  |
|-------------|-----------------------|-------------|-----------------------|
| Drug        | F(1,13)=0.002, p>0.05 | Drug        | F(1,13)=0.05, p>0.05  |
| Interaction | F(9,117)=0.90, p>0.05 | Interaction | F(9,117)=0.65, p>0.05 |

Experiment 1b Acute Nicotine (0 or 0.09 mg/kg, IP after criterion)

| Efficiency Ratio |      |          |      |      | Rewards |       |          |       |      |
|------------------|------|----------|------|------|---------|-------|----------|-------|------|
| Saline           |      | Nicotine |      |      | Saline  |       | Nicotine |       |      |
| Day              | Mean | SEM      | Mean | SEM  | Day     | Mean  | SEM      | Mean  | SEM  |
| 1                | 0.67 | 0.06     | 0.71 | 0.05 | 1       | 32.83 | 1.68     | 35.15 | 1.34 |
| 2                | 0.62 | 0.06     | 0.73 | 0.06 | 2       | 31.42 | 2.73     | 34.69 | 2.34 |
| 3                | 0.59 | 0.05     | 0.71 | 0.07 | 3       | 37.25 | 1.56     | 36.62 | 1.98 |
| 4                | 0.60 | 0.05     | 0.76 | 0.05 | 4       | 33.75 | 3.05     | 37.15 | 1.50 |
| 5                | 0.62 | 0.04     | 0.76 | 0.04 | 5       | 38.75 | 1.44     | 37.85 | 1.29 |

ANOVAs

| Day         | F(4,23)=0.31, p>0.05 | Day         | F(4,23)=3.14, p<0.05 |
|-------------|----------------------|-------------|----------------------|
| Drug        | F(1,23)=4.65, p<0.05 | Drug        | F(1,23)=0.72, p>0.05 |
| Interaction | F(4,92)=0.61, p>0.05 | Interaction | F(4,92)=0.77, p>0.05 |

Premature "Active" Responses

| Premature "Active" Responses |       |          |       |      | Total ITI Responses |       |          |       |      |
|------------------------------|-------|----------|-------|------|---------------------|-------|----------|-------|------|
| Saline                       |       | Nicotine |       |      | Saline              |       | Nicotine |       |      |
| Day                          | Mean  | SEM      | Mean  | SEM  | Day                 | Mean  | SEM      | Mean  | SEM  |
| 1                            | 24.67 | 8.60     | 15.77 | 3.98 | 1                   | 16.25 | 6.50     | 15.17 | 5.04 |
| 2                            | 21.83 | 5.82     | 13.15 | 5.30 | 2                   | 18.25 | 6.04     | 10.25 | 3.23 |
| 3                            | 27.00 | 2.90     | 18.77 | 6.92 | 3                   | 19.67 | 3.66     | 11.92 | 4.35 |
| 4                            | 23.67 | 3.79     | 10.77 | 2.86 | 4                   | 18.42 | 3.56     | 9.92  | 2.76 |
| 5                            | 26.17 | 4.45     | 13.85 | 4.33 | 5                   | 21.25 | 5.53     | 10.17 | 2.94 |

ANOVAs

| Day         | F(4,23)=0.44, p>0.05 | Day         | F(4,23)=0.16, p>0.05 |
|-------------|----------------------|-------------|----------------------|
| Drug        | F(1,23)=7.16, p<0.05 | Drug        | F(1,23)=3.47, p>0.05 |
| Interaction | F(4,92)=0.10, p>0.05 | Interaction | F(4,92)=0.36, p>0.05 |
