# Supplementary material
Source: PubMed Central journal article supplement (PMC3988695)
Supplement: NIHMS567966-supplement-Supp3.pdf [file NIHMS567966-supplement-Supp3.pdf]

Experiment 3 Nicotine Withdrawal (0 or 6.3 mg/kg/day, SC)

| Efficiency Ratio |      |          |      |      | Rewards |       |          |       |      |
|------------------|------|----------|------|------|---------|-------|----------|-------|------|
| Saline           |      | Nicotine |      |      | Saline  |       | Nicotine |       |      |
| Day              | Mean | SEM      | Mean | SEM  | Day     | Mean  | SEM      | Mean  | SEM  |
| 1                | 0.77 | 0.04     | 0.76 | 0.04 | 1       | 43.75 | 1.62     | 41.69 | 1.21 |
| 2                | 0.81 | 0.05     | 0.81 | 0.03 | 2       | 42.00 | 1.78     | 41.62 | 1.83 |
| 3                | 0.77 | 0.07     | 0.83 | 0.04 | 3       | 45.33 | 1.15     | 42.38 | 1.77 |
| 4                | 0.73 | 0.06     | 0.80 | 0.04 | 4       | 42.67 | 1.32     | 36.69 | 2.55 |
| 5                | 0.76 | 0.06     | 0.81 | 0.04 | 5       | 43.42 | 1.50     | 40.15 | 2.60 |
| 6                | 0.80 | 0.06     | 0.80 | 0.03 | 6       | 45.42 | 1.00     | 41.31 | 1.27 |
| 7                | 0.81 | 0.05     | 0.81 | 0.03 | 7       | 42.08 | 1.56     | 42.31 | 1.26 |
| 8                | 0.75 | 0.06     | 0.75 | 0.06 | 8       | 42.67 | 1.94     | 40.08 | 1.68 |
| 9                | 0.75 | 0.06     | 0.79 | 0.03 | 9       | 37.92 | 2.25     | 41.69 | 0.87 |
| 10               | 0.77 | 0.06     | 0.84 | 0.03 | 10      | 43.42 | 1.37     | 42.85 | 1.19 |

ANOVAs

|             |                       |             |                       |
|-------------|-----------------------|-------------|-----------------------|
| Day         | F(9,23)=1.18, p>0.05  | Day         | F(9,23)=2.09, p<0.05  |
| Drug        | F(1,23)=0.40, p>0.05  | Drug        | F(1,23)=1.52, p>0.05  |
| Interaction | F(9,207)=0.63, p>0.05 | Interaction | F(9,207)=1.93, p<0.05 |

Premature "Active" Responses

| Premature "Active" Responses |       |          |       |      | Total ITI Responses |       |          |       |      |
|------------------------------|-------|----------|-------|------|---------------------|-------|----------|-------|------|
| Saline                       |       | Nicotine |       |      | Saline              |       | Nicotine |       |      |
| Day                          | Mean  | SEM      | Mean  | SEM  | Day                 | Mean  | SEM      | Mean  | SEM  |
| 1                            | 9.25  | 1.76     | 10.62 | 2.29 | 1                   | 12.42 | 3.89     | 10.45 | 1.94 |
| 2                            | 5.50  | 1.27     | 7.54  | 1.65 | 2                   | 9.83  | 4.69     | 7.18  | 1.67 |
| 3                            | 9.92  | 3.40     | 7.69  | 2.26 | 3                   | 16.00 | 9.35     | 7.83  | 2.68 |
| 4                            | 11.75 | 3.31     | 7.62  | 2.18 | 4                   | 16.17 | 6.44     | 8.08  | 2.14 |
| 5                            | 9.67  | 3.18     | 8.15  | 1.97 | 5                   | 15.67 | 7.87     | 7.42  | 2.14 |
| 6                            | 13.17 | 6.26     | 9.38  | 2.32 | 6                   | 22.58 | 17.15    | 6.58  | 1.43 |
| 7                            | 7.00  | 1.79     | 9.23  | 1.94 | 7                   | 11.33 | 4.99     | 7.67  | 1.83 |
| 8                            | 10.42 | 3.00     | 15.31 | 5.82 | 8                   | 24.33 | 16.18    | 11.50 | 3.47 |
| 9                            | 8.75  | 2.56     | 8.85  | 2.01 | 9                   | 20.33 | 13.41    | 8.75  | 1.72 |
| 10                           | 10.58 | 3.40     | 7.54  | 1.83 | 10                  | 20.58 | 13.79    | 6.92  | 1.56 |

ANOVAs

|             |                       |             |                       |
|-------------|-----------------------|-------------|-----------------------|
| Day         | F(9,23)=1.06, p>0.05  | Day         | F(9,23)=1.15, p>0.05  |
| Drug        | F(1,23)=0.02, p>0.05  | Drug        | F(1,23)=0.91, p>0.05  |
| Interaction | F(9,207)=0.80, p>0.05 | Interaction | F(9,207)=0.74, p>0.05 |

Experiment 3 Nicotine Withdrawal (0 or 12.6 mg/kg/day, SC)

| Efficiency Ratio |      |          |      |      | Rewards |       |          |       |      |
|------------------|------|----------|------|------|---------|-------|----------|-------|------|
| Saline           |      | Nicotine |      |      | Saline  |       | Nicotine |       |      |
| Day              | Mean | SEM      | Mean | SEM  | Day     | Mean  | SEM      | Mean  | SEM  |
| 1                | 0.67 | 0.09     | 0.79 | 0.05 | 1       | 38.29 | 2.88     | 34.25 | 2.61 |
| 2                | 0.75 | 0.07     | 0.71 | 0.05 | 2       | 37.29 | 4.37     | 37.88 | 3.17 |
| 3                | 0.72 | 0.09     | 0.80 | 0.04 | 3       | 39.29 | 4.42     | 36.63 | 4.34 |
| 4                | 0.67 | 0.08     | 0.81 | 0.04 | 4       | 38.00 | 5.35     | 39.50 | 2.87 |
| 5                | 0.74 | 0.06     | 0.77 | 0.05 | 5       | 41.14 | 2.92     | 39.13 | 3.69 |
| 6                | 0.79 | 0.06     | 0.80 | 0.04 | 6       | 39.86 | 3.84     | 38.75 | 3.02 |
| 7                | 0.63 | 0.07     | 0.83 | 0.03 | 7       | 38.14 | 5.22     | 41.75 | 2.48 |
| 8                | 0.74 | 0.08     | 0.80 | 0.06 | 8       | 35.71 | 4.16     | 39.50 | 1.45 |
| 9                | 0.74 | 0.08     | 0.78 | 0.04 | 9       | 38.57 | 4.10     | 39.25 | 2.72 |
| 10               | 0.79 | 0.05     | 0.73 | 0.06 | 10      | 39.86 | 3.26     | 37.50 | 4.05 |

ANOVAs

|             |                       |             |                       |
|-------------|-----------------------|-------------|-----------------------|
| Day         | F(9,13)=0.37, p>0.05  | Day         | F(9,13)=0.38, p>0.05  |
| Drug        | F(1,13)=1.20, p>0.05  | Drug        | F(1,13)=0.003, p>0.05 |
| Interaction | F(9,117)=1.32, p>0.05 | Interaction | F(9,117)=0.48, p>0.05 |

Premature "Active" Responses

| Premature "Active" Responses |       |          |       |      | Total ITI Responses |       |          |       |      |
|------------------------------|-------|----------|-------|------|---------------------|-------|----------|-------|------|
| Saline                       |       | Nicotine |       |      | Saline              |       | Nicotine |       |      |
| Day                          | Mean  | SEM      | Mean  | SEM  | Day                 | Mean  | SEM      | Mean  | SEM  |
| 1                            | 29.00 | 13.88    | 10.13 | 4.26 | 1                   | 19.00 | 8.33     | 7.63  | 2.67 |
| 2                            | 14.86 | 6.65     | 17.88 | 6.70 | 2                   | 8.29  | 3.02     | 10.50 | 3.74 |
| 3                            | 21.00 | 10.44    | 8.63  | 2.69 | 3                   | 10.29 | 4.13     | 4.88  | 1.25 |
| 4                            | 20.43 | 8.00     | 7.63  | 2.56 | 4                   | 13.86 | 5.34     | 5.88  | 1.81 |
| 5                            | 12.57 | 3.46     | 13.75 | 5.74 | 5                   | 9.57  | 2.30     | 8.25  | 3.40 |
| 6                            | 10.29 | 3.99     | 8.50  | 2.22 | 6                   | 7.86  | 2.50     | 7.13  | 1.79 |
| 7                            | 17.71 | 3.95     | 7.50  | 1.96 | 7                   | 13.43 | 2.84     | 6.00  | 1.31 |
| 8                            | 14.29 | 6.71     | 10.00 | 4.26 | 8                   | 9.29  | 3.50     | 9.50  | 3.97 |
| 9                            | 15.43 | 6.20     | 8.25  | 1.40 | 9                   | 9.86  | 3.00     | 8.50  | 2.83 |
| 10                           | 8.43  | 2.31     | 13.25 | 4.88 | 10                  | 8.71  | 2.65     | 11.00 | 3.62 |

ANOVAs

|             |                       |             |                       |
|-------------|-----------------------|-------------|-----------------------|
| Day         | F(9,13)=0.80, p>0.05  | Day         | F(9,13)=0.56, p>0.05  |
| Drug        | F(1,13)=1.25, p>0.05  | Drug        | F(1,13)=1.27, p>0.05  |
| Interaction | F(9,117)=1.42, p>0.05 | Interaction | F(9,117)=1.19, p>0.05 |

Experiment 3 Nicotine Withdrawal (0 or 36 mg/kg/day, SC)

| Experiment 3 Nicotine Withdrawal (0 or 36 mg/kg/day, SC) |      |          |      |      |         |       |          |       |      |
|----------------------------------------------------------|------|----------|------|------|---------|-------|----------|-------|------|
| Efficiency Ratio                                         |      |          |      |      | Rewards |       |          |       |      |
| Saline                                                   |      | Nicotine |      |      | Saline  |       | Nicotine |       |      |
| Day                                                      | Mean | SEM      | Mean | SEM  | Day     | Mean  | SEM      | Mean  | SEM  |
| 1                                                        | 0.67 | 0.06     | 0.65 | 0.06 | 1       | 38.33 | 2.26     | 40.08 | 2.76 |
| 2                                                        | 0.70 | 0.08     | 0.72 | 0.05 | 2       | 38.42 | 2.04     | 37.85 | 2.99 |
| 3                                                        | 0.72 | 0.07     | 0.72 | 0.06 | 3       | 38.25 | 2.33     | 40.62 | 2.19 |
| 4                                                        | 0.69 | 0.07     | 0.77 | 0.06 | 4       | 38.58 | 2.19     | 40.62 | 2.32 |
| 5                                                        | 0.70 | 0.07     | 0.75 | 0.07 | 5       | 37.67 | 2.09     | 38.31 | 3.74 |
| 6                                                        | 0.69 | 0.07     | 0.79 | 0.06 | 6       | 39.83 | 1.92     | 41.08 | 2.19 |
| 7                                                        | 0.73 | 0.05     | 0.71 | 0.05 | 7       | 42.25 | 2.54     | 43.46 | 1.92 |
| 8                                                        | 0.72 | 0.06     | 0.76 | 0.04 | 8       | 41.17 | 1.90     | 42.00 | 1.73 |
| 9                                                        | 0.73 | 0.06     | 0.80 | 0.04 | 9       | 42.00 | 2.13     | 40.77 | 1.45 |
| 10                                                       | 0.73 | 0.05     | 0.74 | 0.04 | 10      | 35.50 | 3.69     | 40.08 | 2.87 |

ANOVAs

| ANOVAs      |                       | ANOVAs      |                       |
|-------------|-----------------------|-------------|-----------------------|
| Day         | F(9,23)=1.29, p>0.05  | Day         | F(9,23)=2.09, p<0.05  |
| Drug        | F(1,23)=0.21, p>0.05  | Drug        | F(1,23)=0.24, p>0.05  |
| Interaction | F(9,207)=0.83, p>0.05 | Interaction | F(9,207)=0.46, p>0.05 |

Premature "Active" Responses

Total ITI Responses

| Premature "Active" Responses / Total ITI Responses |       |          |       |      |        |       |          |       |      |
|----------------------------------------------------|-------|----------|-------|------|--------|-------|----------|-------|------|
| Saline                                             |       | Nicotine |       |      | Saline |       | Nicotine |       |      |
| Day                                                | Mean  | SEM      | Mean  | SEM  | Day    | Mean  | SEM      | Mean  | SEM  |
| 1                                                  | 21.08 | 8.47     | 23.46 | 6.79 | 1      | 16.42 | 5.29     | 16.69 | 4.03 |
| 2                                                  | 45.58 | 35.42    | 13.46 | 3.00 | 2      | 21.42 | 10.90    | 9.85  | 2.65 |
| 3                                                  | 20.25 | 11.31    | 18.92 | 7.00 | 3      | 15.67 | 6.57     | 12.69 | 4.20 |
| 4                                                  | 24.33 | 12.80    | 13.31 | 5.51 | 4      | 18.08 | 7.62     | 9.31  | 3.35 |
| 5                                                  | 39.92 | 30.43    | 12.15 | 4.86 | 5      | 20.25 | 11.72    | 9.31  | 3.41 |
| 6                                                  | 27.08 | 13.17    | 10.85 | 4.45 | 6      | 16.75 | 5.19     | 8.77  | 3.30 |
| 7                                                  | 14.75 | 4.38     | 16.77 | 5.91 | 7      | 14.33 | 5.91     | 14.92 | 4.44 |
| 8                                                  | 15.33 | 6.64     | 13.38 | 6.19 | 8      | 16.58 | 6.31     | 10.00 | 4.19 |
| 9                                                  | 14.83 | 5.03     | 8.31  | 2.73 | 9      | 13.25 | 4.92     | 7.92  | 2.09 |
| 10                                                 | 11.25 | 3.63     | 10.23 | 2.22 | 10     | 8.50  | 1.79     | 9.23  | 1.73 |

ANOVAs

ANOVAs

| ANOVAs      |                       | ANOVAs      |                       |
|-------------|-----------------------|-------------|-----------------------|
| Day         | F(9,23)=1.05, p>0.05  | Day         | F(9,23)=0.87, p>0.05  |
| Drug        | F(1,23)=0.54, p>0.05  | Drug        | F(1,23)=0.72, p>0.05  |
| Interaction | F(9,207)=1.10, p>0.05 | Interaction | F(9,207)=0.91, p>0.05 |

Experiment 3 Nicotine Withdrawal (0 or 6.3 mg/kg/day, SC Transient Effects)

| Experiment 3 Nicotine Withdrawal (0 or 6.3 mg/kg/day, SC Transient Effects) |      |          |      |      |         |       |          |       |      |
|-----------------------------------------------------------------------------|------|----------|------|------|---------|-------|----------|-------|------|
| Efficiency Ratio                                                            |      |          |      |      | Rewards |       |          |       |      |
| Saline                                                                      |      | Nicotine |      |      | Saline  |       | Nicotine |       |      |
| Hour                                                                        | Mean | SEM      | Mean | SEM  | Hour    | Mean  | SEM      | Mean  | SEM  |
| 3                                                                           | 0.79 | 0.05     | 0.88 | 0.02 | 3       | 37.83 | 0.91     | 37.33 | 2.87 |
| 6                                                                           | 0.72 | 0.07     | 0.80 | 0.07 | 6       | 41.50 | 0.99     | 41.67 | 1.43 |
| 12                                                                          | 0.83 | 0.04     | 0.81 | 0.07 | 12      | 37.00 | 1.15     | 35.33 | 2.40 |
| 24                                                                          | 0.76 | 0.06     | 0.69 | 0.08 | 24      | 23.50 | 2.57     | 16.17 | 4.13 |
| 48                                                                          | 0.84 | 0.03     | 0.69 | 0.07 | 48      | 30.00 | 2.57     | 24.50 | 2.59 |

ANOVAs

ANOVAs

| ANOVAs      |                      | ANOVAs      |                       |
|-------------|----------------------|-------------|-----------------------|
| Hour        | F(4,10)=1.78, p>0.05 | Hour        | F(4,10)=43.05, p<0.05 |
| Drug        | F(1,10)=0.01, p>0.05 | Drug        | F(1,10)=1.61, p>0.05  |
| Interaction | F(4,40)=1.76, p>0.05 | Interaction | F(4,40)=1.50, p>0.05  |

Premature "Active" Responses

Total ITI Responses

| Premature "Active" Responses / Total ITI Responses |      |          |      |      |        |      |          |      |      |
|----------------------------------------------------|------|----------|------|------|--------|------|----------|------|------|
| Saline                                             |      | Nicotine |      |      | Saline |      | Nicotine |      |      |
| Hour                                               | Mean | SEM      | Mean | SEM  | Hour   | Mean | SEM      | Mean | SEM  |
| 3                                                  | 0.17 | 0.17     | 1.50 | 0.72 | 3      | 4.00 | 1.77     | 3.33 | 0.99 |
| 6                                                  | 0.17 | 0.17     | 5.83 | 3.72 | 6      | 8.00 | 3.60     | 7.67 | 3.29 |
| 12                                                 | 0.83 | 0.40     | 2.17 | 1.11 | 12     | 3.17 | 1.08     | 3.50 | 1.54 |
| 24                                                 | 2.50 | 0.72     | 3.00 | 0.77 | 24     | 2.67 | 0.84     | 2.67 | 0.67 |
| 48                                                 | 0.33 | 0.21     | 3.00 | 0.89 | 48     | 1.33 | 0.61     | 4.00 | 1.06 |

ANOVAs

ANOVAs

| ANOVAs      |                      | ANOVAs      |                      |
|-------------|----------------------|-------------|----------------------|
| Hour        | F(4,10)=1.31, p>0.05 | Hour        | F(4,10)=3.73, p>0.05 |
| Drug        | F(1,10)=3.42, p>0.05 | Drug        | F(1,10)=0.06, p>0.05 |
| Interaction | F(4,40)=1.66, p>0.05 | Interaction | F(4,40)=0.35, p>0.05 |
